# Supplementary material for: Current Challenges in the Treatment of the Omphalocele—Experience of a Tertiary Center from Romania
Source: MDPI journal article supplement (doi:10.3390/jcm11195711), 2022-09-27
Supplement: s1 [file jcm-1900413-supplementary.pdf › jcm-1900413-supplementary.pdf]

## Supplementary materials

**Table S1.** Descriptive statistics of the patients

| Indicator                          | DECADE  | N   | Mean    | Median  | Min     | Max     | Shapiro-Wilk |        |
|------------------------------------|---------|-----|---------|---------|---------|---------|--------------|--------|
|                                    |         |     |         |         |         |         | W            | p      |
| GESTATIONAL AGE (weeks)            | 1       | 46  | 37.96   | 39.00   | 30.00   | 43.00   | 0.79         | < .001 |
|                                    | 2       | 53  | 36.32   | 38.00   | 29.00   | 41.00   | 0.90         | < .001 |
|                                    | 3       | 40  | 36.95   | 38.00   | 27.00   | 40.00   | 0.74         | < .001 |
|                                    | Overall | 139 | 37.04   | 38.00   | 27.00   | 43.00   | 0.85         | < .001 |
| BIRTH WEIGHT (grams)               | 1       | 46  | 2746.96 | 2750.00 | 1700.00 | 4700.00 | 0.93         | 0.009  |
|                                    | 2       | 53  | 2665.09 | 2700.00 | 900.00  | 4200.00 | 0.99         | 0.824  |
|                                    | 3       | 40  | 2764.25 | 2900.00 | 940.00  | 4100.00 | 0.94         | 0.024  |
|                                    | Overall | 139 | 2720.72 | 2750.00 | 900.00  | 4700.00 | 0.99         | 0.532  |
| LENGHT (centimeters)               | 1       | 46  | 47.98   | 49.00   | 37.00   | 53.00   | 0.90         | 0.001  |
|                                    | 2       | 53  | 46.93   | 48.00   | 31.00   | 54.00   | 0.93         | 0.003  |
|                                    | 3       | 40  | 47.56   | 48.00   | 35.00   | 52.00   | 0.87         | < .001 |
|                                    | Overall | 139 | 47.46   | 48.00   | 31.00   | 54.00   | 0.90         | < .001 |
| DEFECT SIZE (centimeters)          | 1       | 46  | 6.85    | 6.00    | 2.00    | 18.00   | 0.91         | 0.002  |
|                                    | 2       | 53  | 6.83    | 6.00    | 3.00    | 18.00   | 0.87         | < .001 |
|                                    | 3       | 40  | 5.50    | 5.00    | 2.00    | 15.00   | 0.86         | < .001 |
|                                    | Overall | 139 | 6.45    | 5.50    | 2.00    | 18.00   | 0.89         | < .001 |
| LENGTH OF HOSPITALIZATION (days)   | 1       | 46  | 16.81   | 10.00   | 1.00    | 54.00   | 0.85         | < .001 |
|                                    | 2       | 53  | 24.69   | 14.00   | 1.00    | 121.00  | 0.71         | < .001 |
|                                    | 3       | 34  | 21.18   | 12.50   | 2.00    | 153.00  | 0.53         | < .001 |
|                                    | Overall | 133 | 21.07   | 12.00   | 1.00    | 153.00  | 0.68         | < .001 |
| AGE AT THE TIME OF SURGERY (hours) | 1       | 26  | 51.69   | 18.00   | 3.00    | 316.00  | 0.64         | < .001 |
|                                    | 2       | 29  | 48.19   | 12.00   | 3.00    | 252.00  | 0.68         | < .001 |
|                                    | 3       | 29  | 75.38   | 40.00   | 6.00    | 432.00  | 0.71         | < .001 |
|                                    | Overall | 84  | 58.66   | 20.50   | 3.00    | 432.00  | 0.69         | < .001 |
| AGE AT DEATH (days)                | 1       | 24  | 9.21    | 5.40    | 0.50    | 54.00   | 0.65         | < .001 |
|                                    | 2       | 31  | 13.98   | 7.00    | 1.00    | 81.00   | 0.74         | < .001 |
|                                    | 3       | 17  | 25.96   | 10.00   | 2.00    | 153.00  | 0.59         | < .001 |
|                                    | Overall | 72  | 15.22   | 6.90    | 0.50    | 153.00  | 0.56         | < .001 |
| AGE AT ADMISSION (hours)           | 1       | 46  | 10.95   | 5.00    | 0.50    | 102.00  | 0.46         | < .001 |
|                                    | 2       | 53  | 10.34   | 4.50    | 0.50    | 160.00  | 0.34         | < .001 |
|                                    | 3       | 39  | 12.56   | 5.50    | 1.50    | 84.00   | 0.55         | < .001 |
|                                    | Overall | 138 | 11.17   | 5.00    | 0.50    | 160.00  | 0.44         | < .001 |
| MOTHER'S AGE (years)               | 1       | 46  | 27.30   | 26.00   | 17.00   | 43.00   | 0.95         | 0.039  |
|                                    | 2       | 53  | 26.19   | 25.00   | 15.00   | 45.00   | 0.93         | 0.005  |
|                                    | 3       | 38  | 30.18   | 31.00   | 17.00   | 45.00   | 0.97         | 0.364  |
|                                    | Overall | 137 | 27.67   | 27.00   | 15.00   | 45.00   | 0.96         | < .001 |
| FATHER'S AGE (years)               | 1       | 46  | 31.04   | 30.00   | 21.00   | 49.00   | 0.94         | 0.029  |
|                                    | 2       | 53  | 30.34   | 30.00   | 18.00   | 48.00   | 0.97         | 0.180  |
|                                    | 3       | 37  | 35.62   | 37.00   | 22.00   | 49.00   | 0.97         | 0.341  |
|                                    | Overall | 136 | 32.01   | 31.00   | 18.00   | 49.00   | 0.97         | 0.009  |

**Table S2.** Model summary

| Step | -2 Log likelihood | Cox & Snell R Square | Nagelkerke R Square |
|------|-------------------|----------------------|---------------------|
| 1    | 165.685           | 0.175                | 0.233               |
| 2    | 144.466           | 0.291                | 0.389               |
| 3    | 132.079           | 0.352                | 0.469               |
| 4    | 121.620           | 0.399                | 0.532               |
| 5    | 113.630           | 0.432                | 0.577               |
| 6    | 108.090           | 0.455                | 0.607               |

Step 1. Predictors: (Constant), Sepsis

Step 2. Predictors: (Constant), Sepsis, Acute renal failure

Step 3 Predictors: (Constant), Sepsis, Acute renal failure, Associated abnormalities

Step. 4 Predictors: (Constant), Sepsis, Acute renal failure, Associated abnormalities, Hemorrhagic disease

Step. 5 Predictors: (Constant), Sepsis, Acute renal failure, Associated abnormalities, Hemorrhagic disease, Treatment

Step. 6 Predictors: (Constant), Sepsis, Acute renal failure, Associated abnormalities, Hemorrhagic disease, Treatment, Prematurity

**Table S3.** Variables in the Equation

| Variables           |                              | B      | S.E.  | Wald   | df | Sig.  | Exp(B) | 95% C.I.for EXP(B) |        |
|---------------------|------------------------------|--------|-------|--------|----|-------|--------|--------------------|--------|
|                     |                              |        |       |        |    |       |        | Lower              | Upper  |
| Step 1 <sup>a</sup> | Sepsis (1)                   | 2.063  | 0.444 | 21.595 | 1  | 0.000 | 7.871  | 3.297              | 18.792 |
|                     | Constant                     | -0.505 | 0.214 | 5.569  | 1  | 0.018 | 0.603  |                    |        |
| Step 2 <sup>b</sup> | Sepsis (1)                   | 1.936  | 0.470 | 16.937 | 1  | 0.000 | 6.933  | 2.757              | 17.433 |
|                     | Acute renal failure (1)      | 2.784  | 0.780 | 12.746 | 1  | 0.000 | 16.176 | 3.509              | 74.566 |
|                     | Constant                     | -0.867 | 0.243 | 12.723 | 1  | 0.000 | 0.420  |                    |        |
| Step 3 <sup>c</sup> | Sepsis (1)                   | 2.246  | 0.508 | 19.517 | 1  | 0.000 | 9.449  | 3.489              | 25.594 |
|                     | Associated abnormalities (1) | 1.598  | 0.473 | 11.426 | 1  | 0.001 | 4.942  | 1.957              | 12.479 |
|                     | Acute renal failure (1)      | 2.538  | 0.802 | 10.021 | 1  | 0.002 | 12.655 | 2.629              | 60.910 |
|                     | Constant                     | -1.468 | 0.328 | 19.986 | 1  | 0.000 | 0.230  |                    |        |
| Step 4 <sup>d</sup> | Sepsis (1)                   | 2.288  | 0.545 | 17.648 | 1  | 0.000 | 9.854  | 3.389              | 28.654 |
|                     | Associated abnormalities (1) | 1.711  | 0.510 | 11.235 | 1  | 0.001 | 5.534  | 2.035              | 15.050 |
|                     | Acute renal failure (1)      | 2.035  | 0.816 | 6.222  | 1  | 0.013 | 7.656  | 1.547              | 37.896 |
|                     | Associated abnormalities (1) | 2.162  | 0.746 | 8.405  | 1  | 0.004 | 8.689  | 2.014              | 37.476 |
|                     | Constant                     | -1.781 | 0.373 | 22.771 | 1  | 0.000 | 0.169  |                    |        |
| Step 5 <sup>e</sup> | Sepsis (1)                   | 2.286  | 0.565 | 16.357 | 1  | 0.000 | 9.835  | 3.248              | 29.779 |
|                     | Associated abnormalities (1) | 1.907  | 0.545 | 12.229 | 1  | 0.000 | 6.730  | 2.312              | 19.594 |
|                     | Acute renal failure (1)      | 2.274  | 0.858 | 7.019  | 1  | 0.008 | 9.721  | 1.807              | 52.292 |
|                     | Treatment (1)                | 1.342  | 0.493 | 7.416  | 1  | 0.006 | 3.828  | 1.457              | 10.057 |
|                     | Hemorrhagic disease (1)      | 2.079  | 0.773 | 7.229  | 1  | 0.007 | 7.994  | 1.757              | 36.380 |
|                     | Constant                     | -2.452 | 0.484 | 25.708 | 1  | 0.000 | 0.086  |                    |        |

|                     |                              |        |       |        |   |       |        |       |        |
|---------------------|------------------------------|--------|-------|--------|---|-------|--------|-------|--------|
| Step 6 <sup>f</sup> | Sepsis (1)                   | 2.567  | 0.604 | 18.053 | 1 | 0.000 | 13.031 | 3.987 | 42.589 |
|                     | Associated abnormalities (1) | 1.837  | 0.566 | 10.532 | 1 | 0.001 | 6.276  | 2.070 | 19.029 |
|                     | Acute renal failure (1)      | 2.382  | 0.885 | 7.243  | 1 | 0.007 | 10.824 | 1.910 | 61.340 |
|                     | Treatment (1)                | 1.330  | 0.509 | 6.814  | 1 | 0.009 | 3.780  | 1.393 | 10.257 |
|                     | Hemorrhagic disease (1)      | 1.712  | 0.753 | 5.166  | 1 | 0.023 | 5.543  | 1.266 | 24.267 |
|                     | Prematurity (1)              | 1.286  | 0.557 | 5.323  | 1 | 0.021 | 3.618  | 1.213 | 10.789 |
|                     | Constant                     | -2.858 | 0.558 | 26.192 | 1 | 0.000 | 0.057  |       |        |

*a. Variable(s) entered on step 1: Sepsis*

*b. Variable(s) entered on step 2: Acute renal failure*

*c. Variable(s) entered on step 3: Associated abnormalities*

*d. Variable(s) entered on step 4: Hemorrhagic disease*

*e. Variable(s) entered on step 5: Treatment*

*f. Variable(s) entered on step 6: Prematurity*

**Table S4.** Confusion matrix

| Observed          | Predicted |     | Correct |
|-------------------|-----------|-----|---------|
|                   | NO        | YES |         |
| NO                | 56        | 10  | 84.848  |
| YES               | 11        | 62  | 84.932  |
| Overall % Correct |           |     | 84.892  |

**Table S5.** Collinearity Statistics

| Predictor                | Tolerance | VIF   |
|--------------------------|-----------|-------|
| Sepsis                   | 0.783     | 1.278 |
| Acute renal failure      | 0.949     | 1.053 |
| Associated abnormalities | 0.802     | 1.246 |
| Hemorrhagic disease      | 0.956     | 1.046 |
| Treatment                | 0.901     | 1.110 |
| Prematurity              | 0.883     | 1.133 |

*VIF = Variance inflation factor*
